# Supplementary figures and images for: An unfolded protein-induced conformational switch activates mammalian IRE1
Source: eLife journal article supplement (doi:10.7554/elife.30700), 2017-10-03

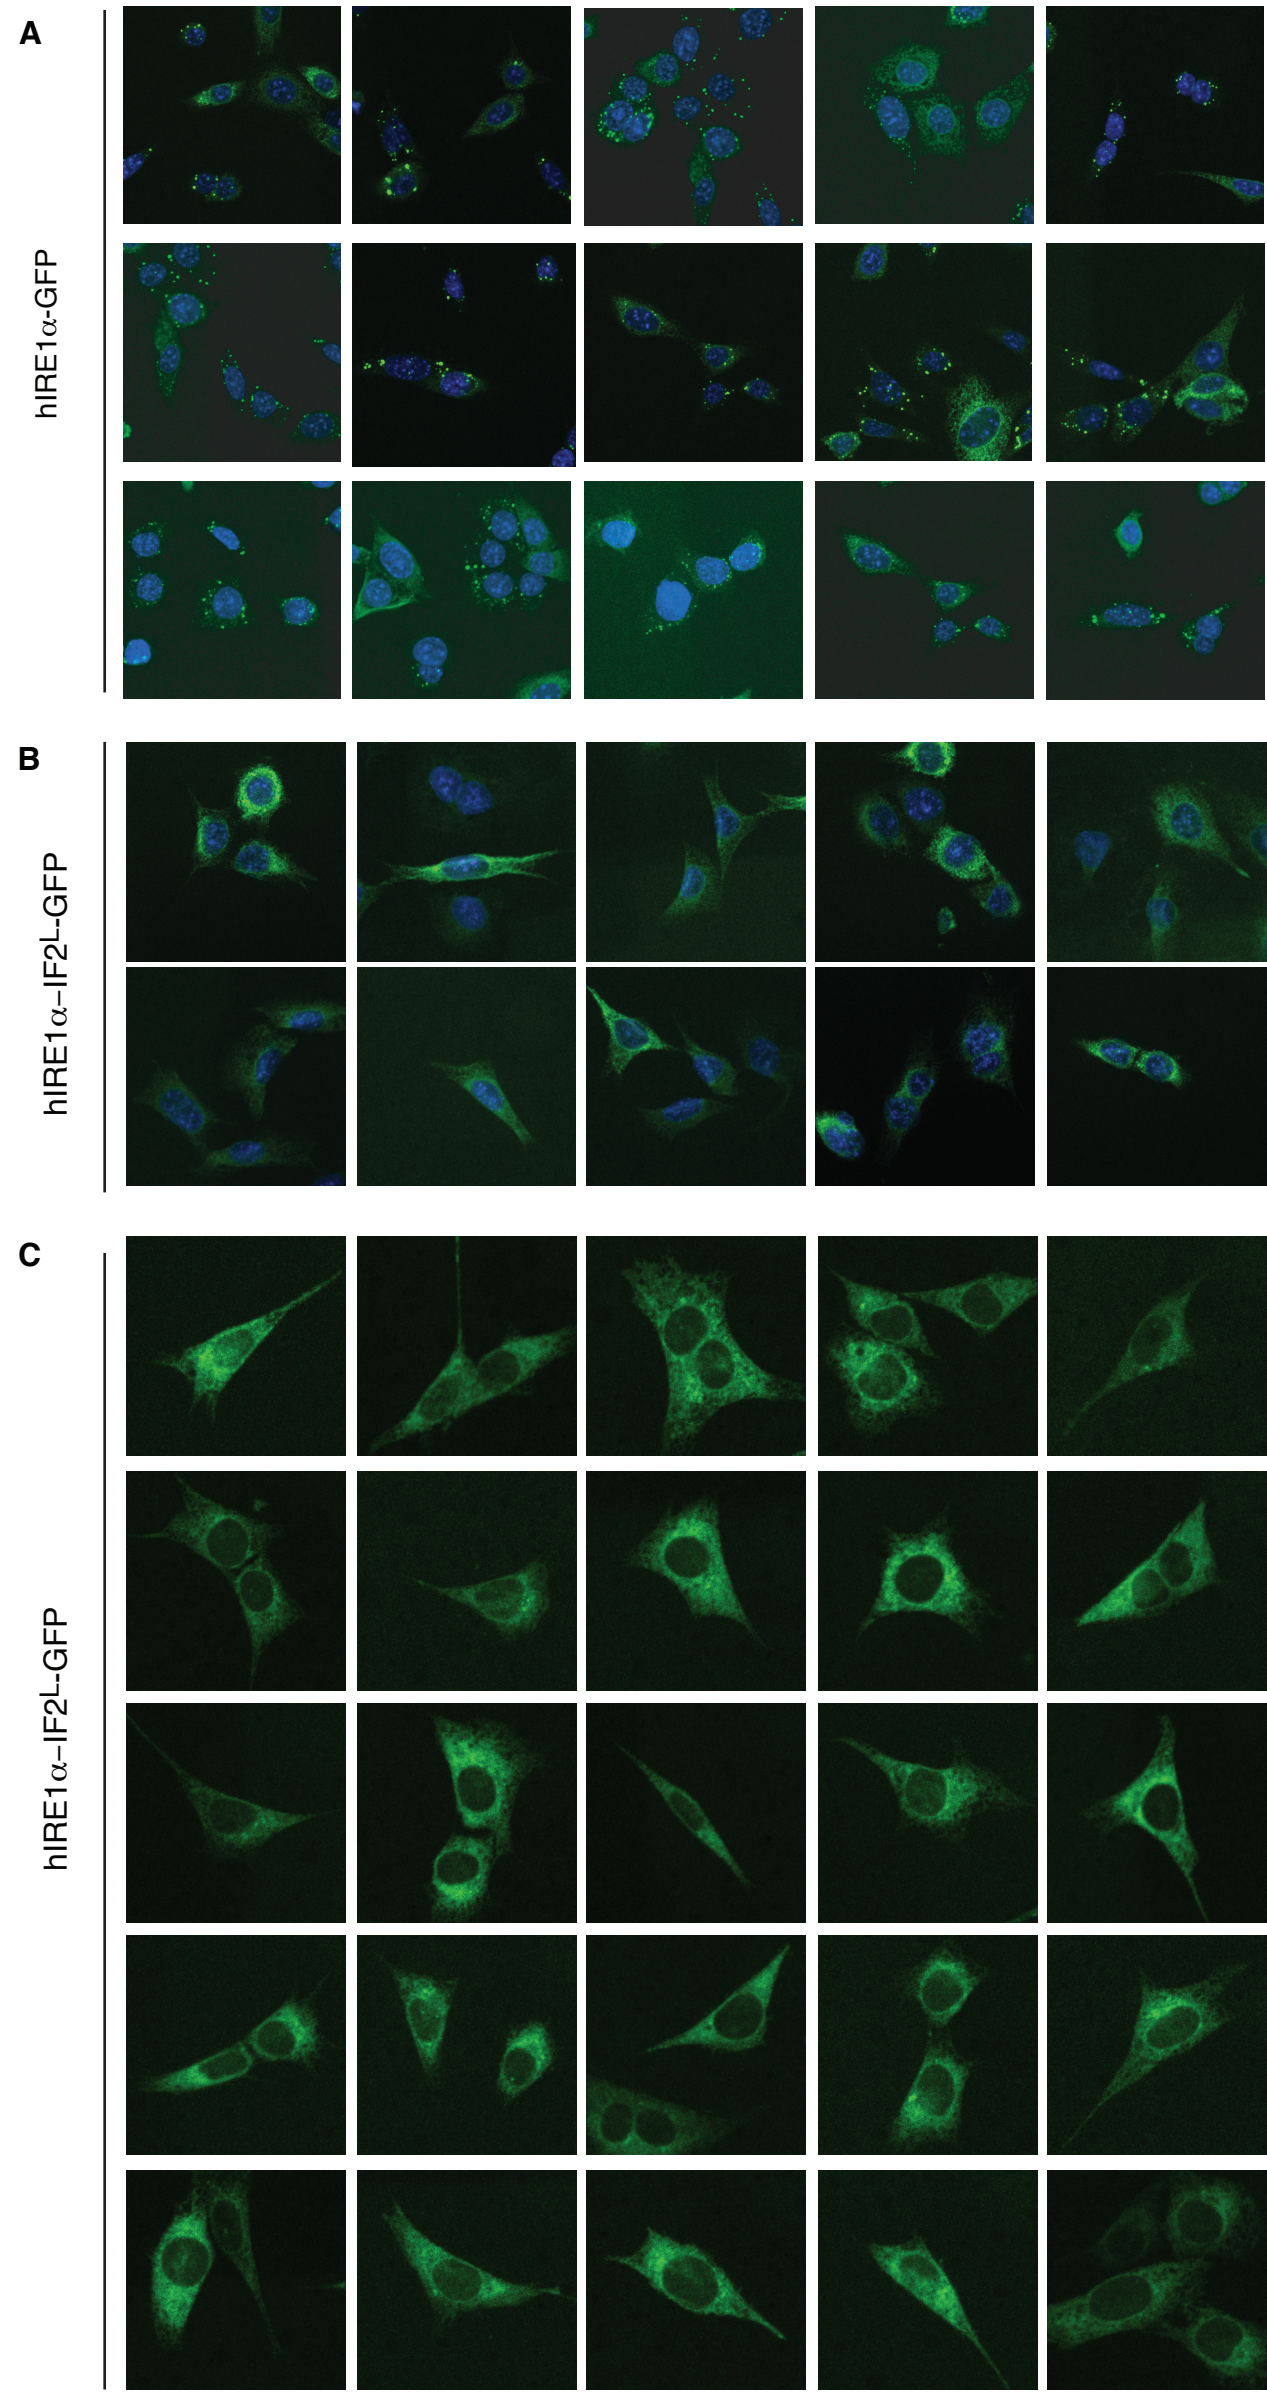

Supplement: supp [file elife-30700-supp-v1.zip]

Karagöz et al., Figure 6-Figure Supplement 2

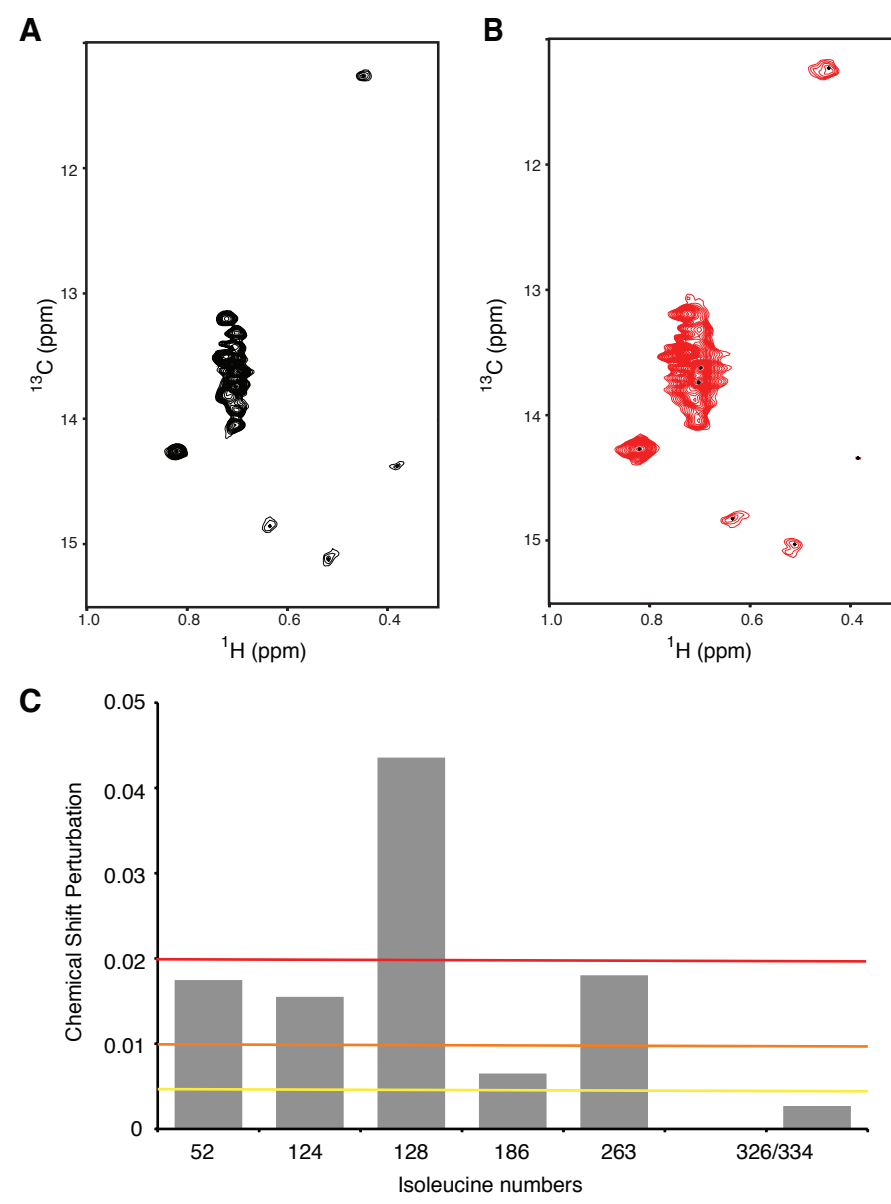

Supplement: supp [file elife-30700-supp-v1.zip]

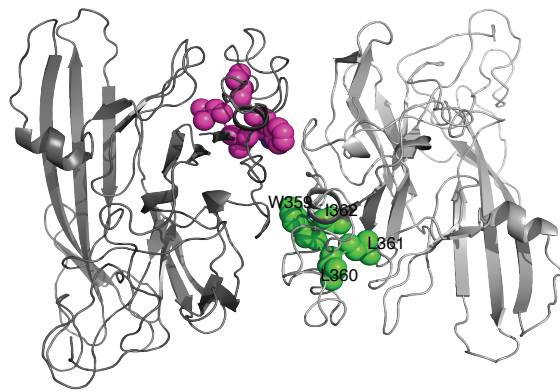

Supplement: supp [file elife-30700-supp-v1.zip]

Karagöz et al., Figure 7-Figure Supplement 1

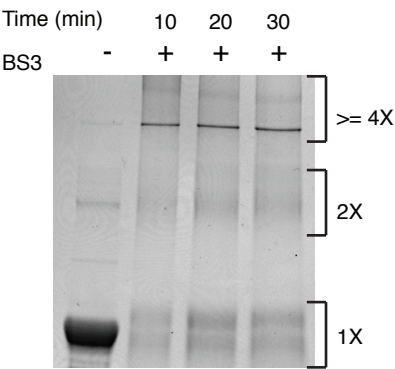

Supplement: supp [file elife-30700-supp-v1.zip]

Karagöz et al., Figure 2-Figure Supplement 2

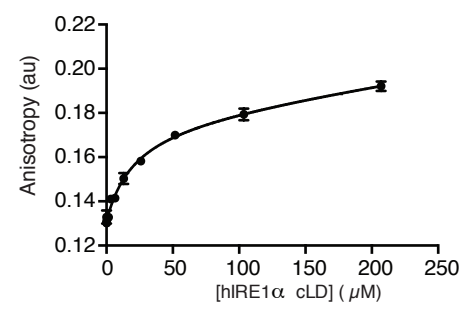

Supplement: supp [file elife-30700-supp-v1.zip]

Karagöz et al., Figure 3-Figure Supplement 3

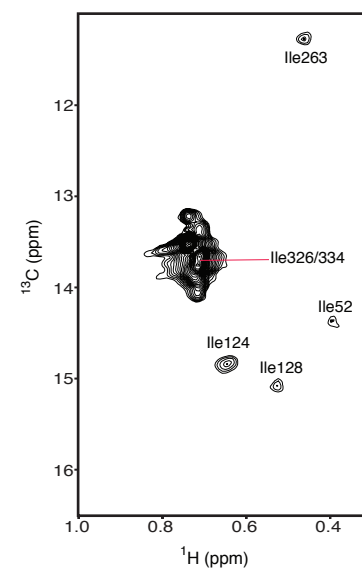

Supplement: supp [file elife-30700-supp-v1.zip]

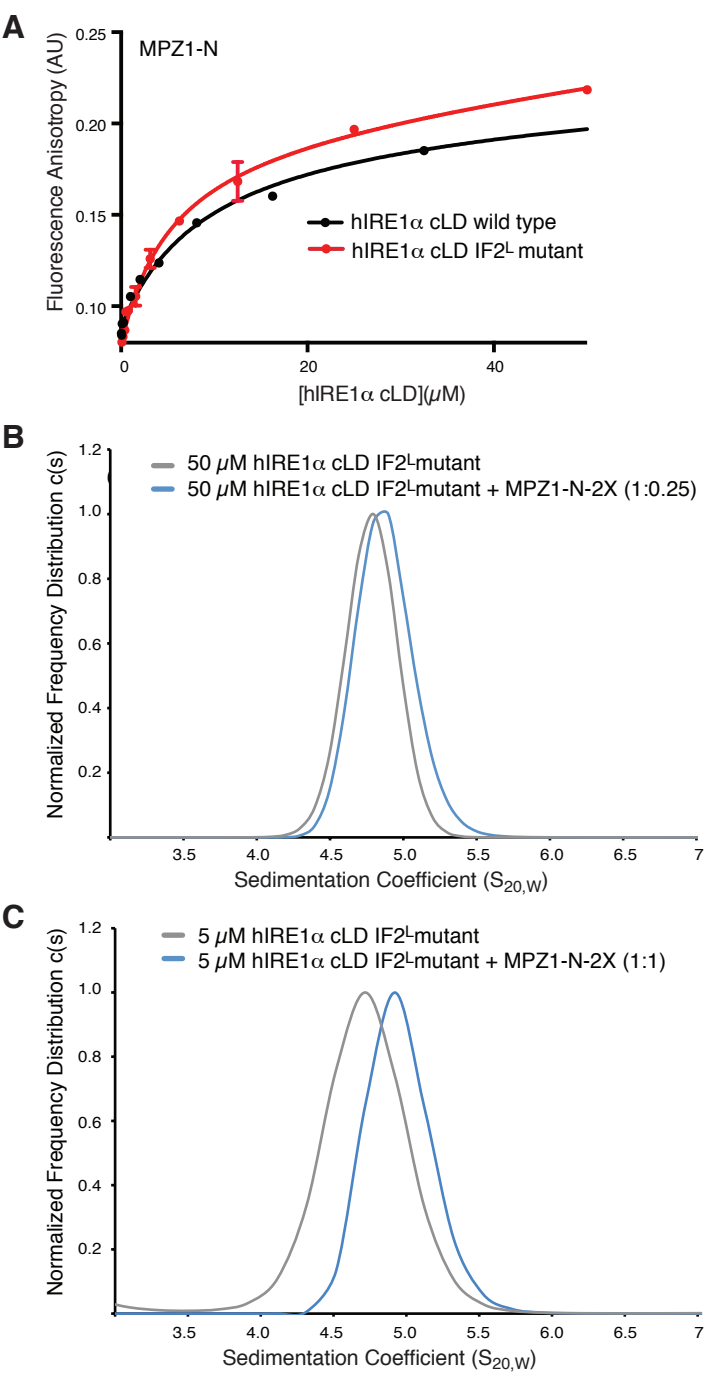

Supplement: supp [file elife-30700-supp-v1.zip]

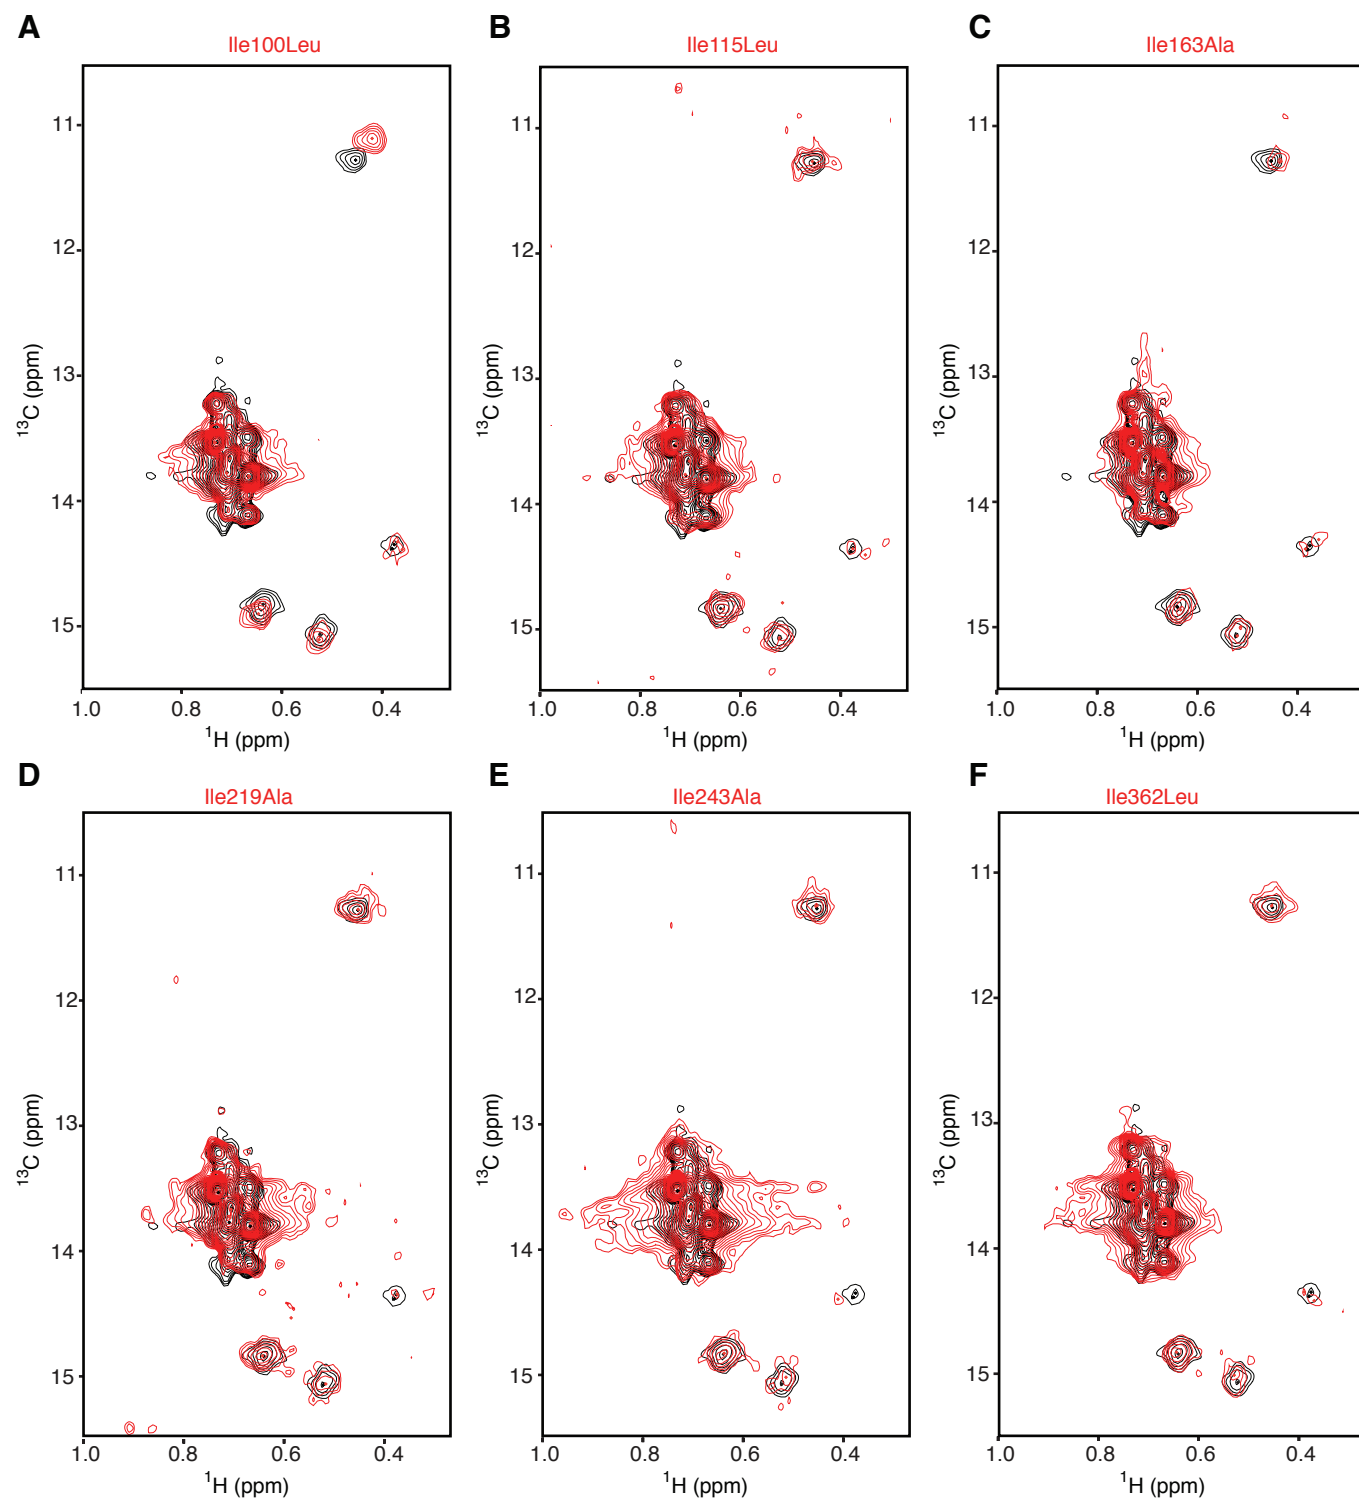

Supplement: supp [file elife-30700-supp-v1.zip]

Karagöz et al., Figure 8-Figure Supplement 1

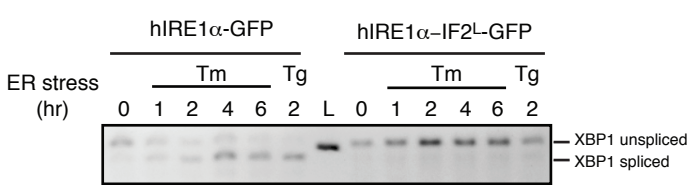

Supplement: supp [file elife-30700-supp-v1.zip]

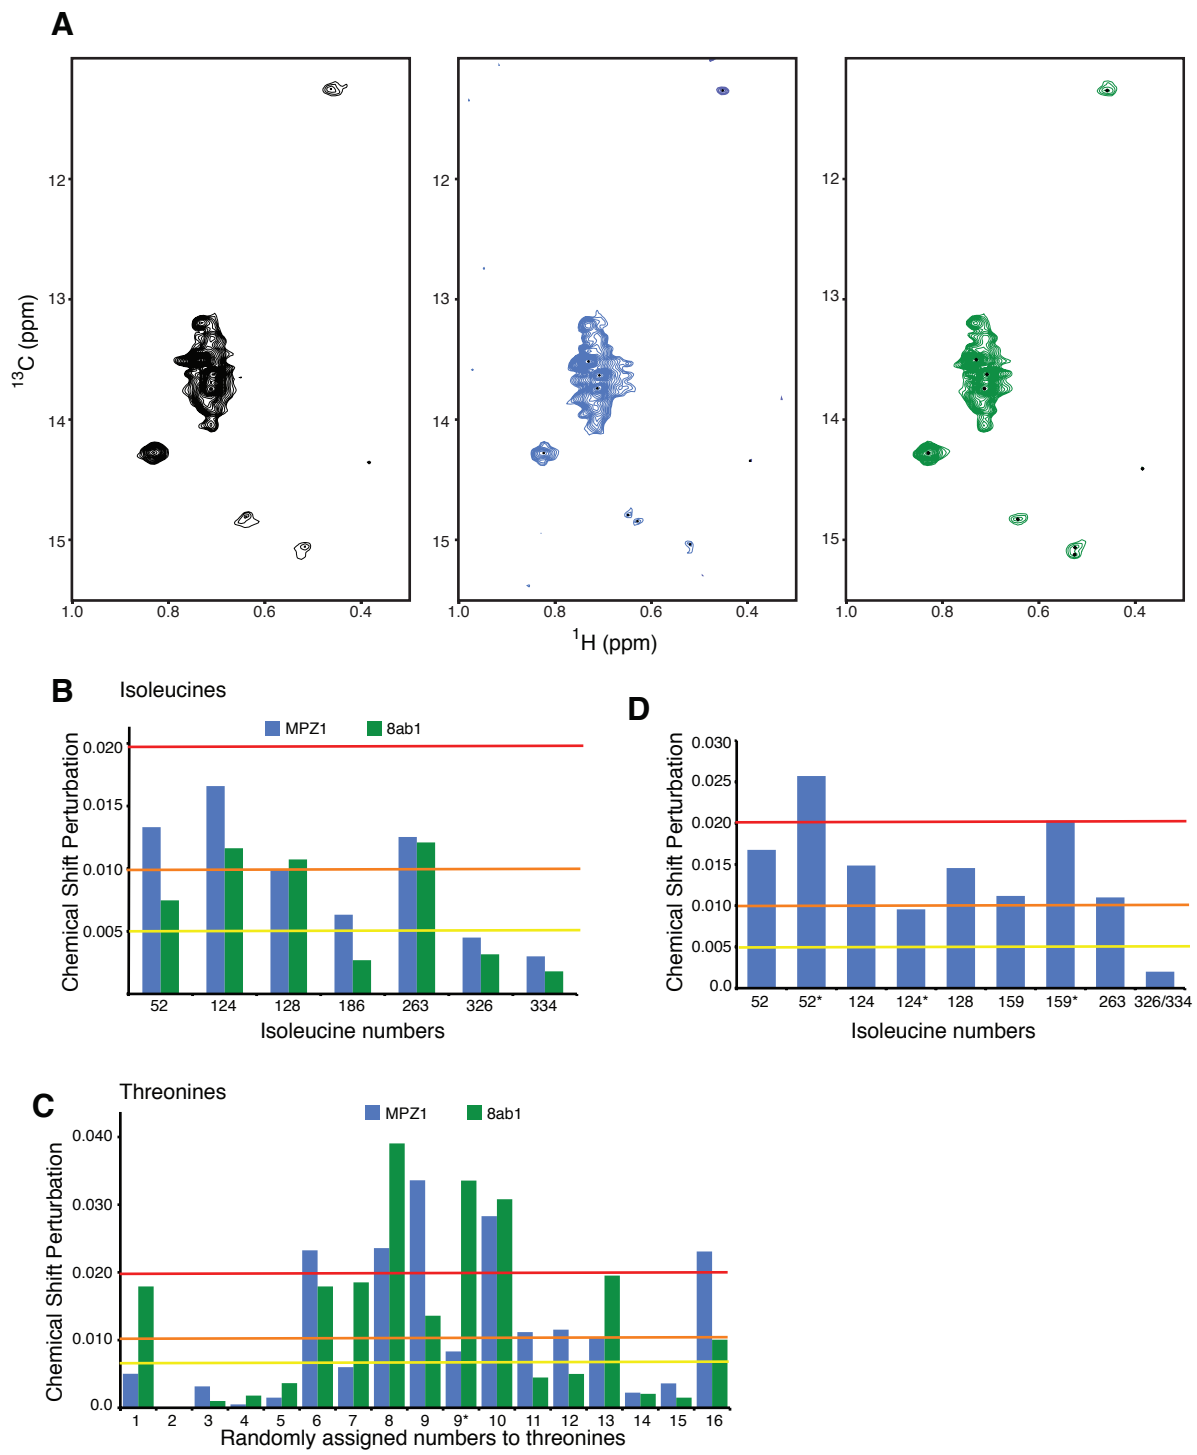

Supplement: supp [file elife-30700-supp-v1.zip]

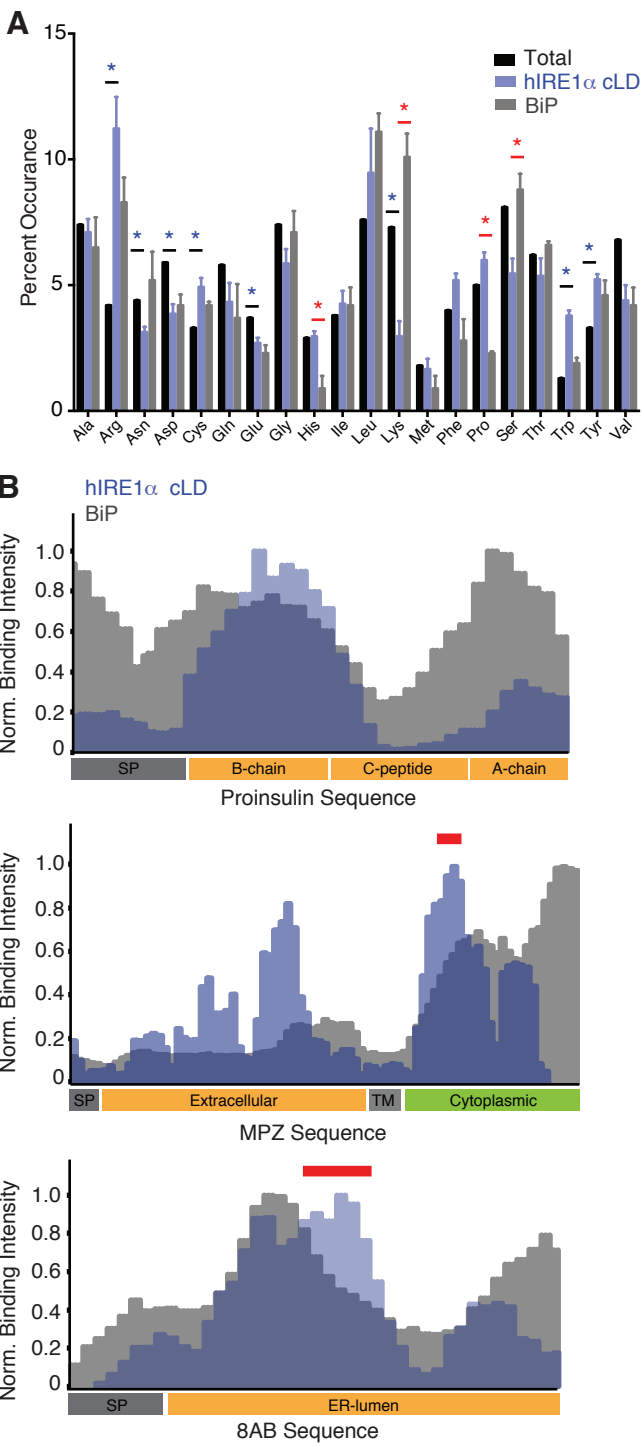

Supplement: supp [file elife-30700-supp-v1.zip]

Karagöz et al., Figure 8-Figure Supplement 2

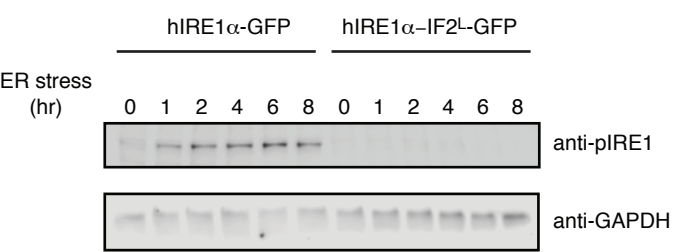

Supplement: supp [file elife-30700-supp-v1.zip]

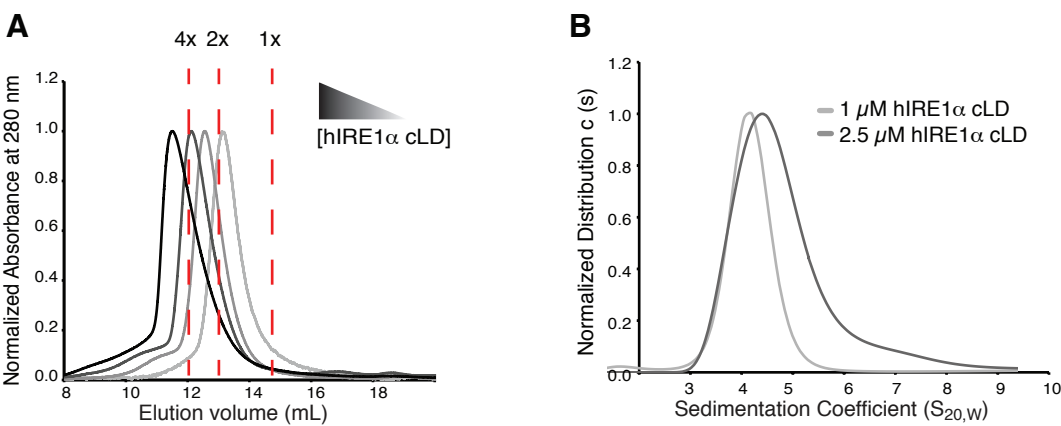

Supplement: supp [file elife-30700-supp-v1.zip]

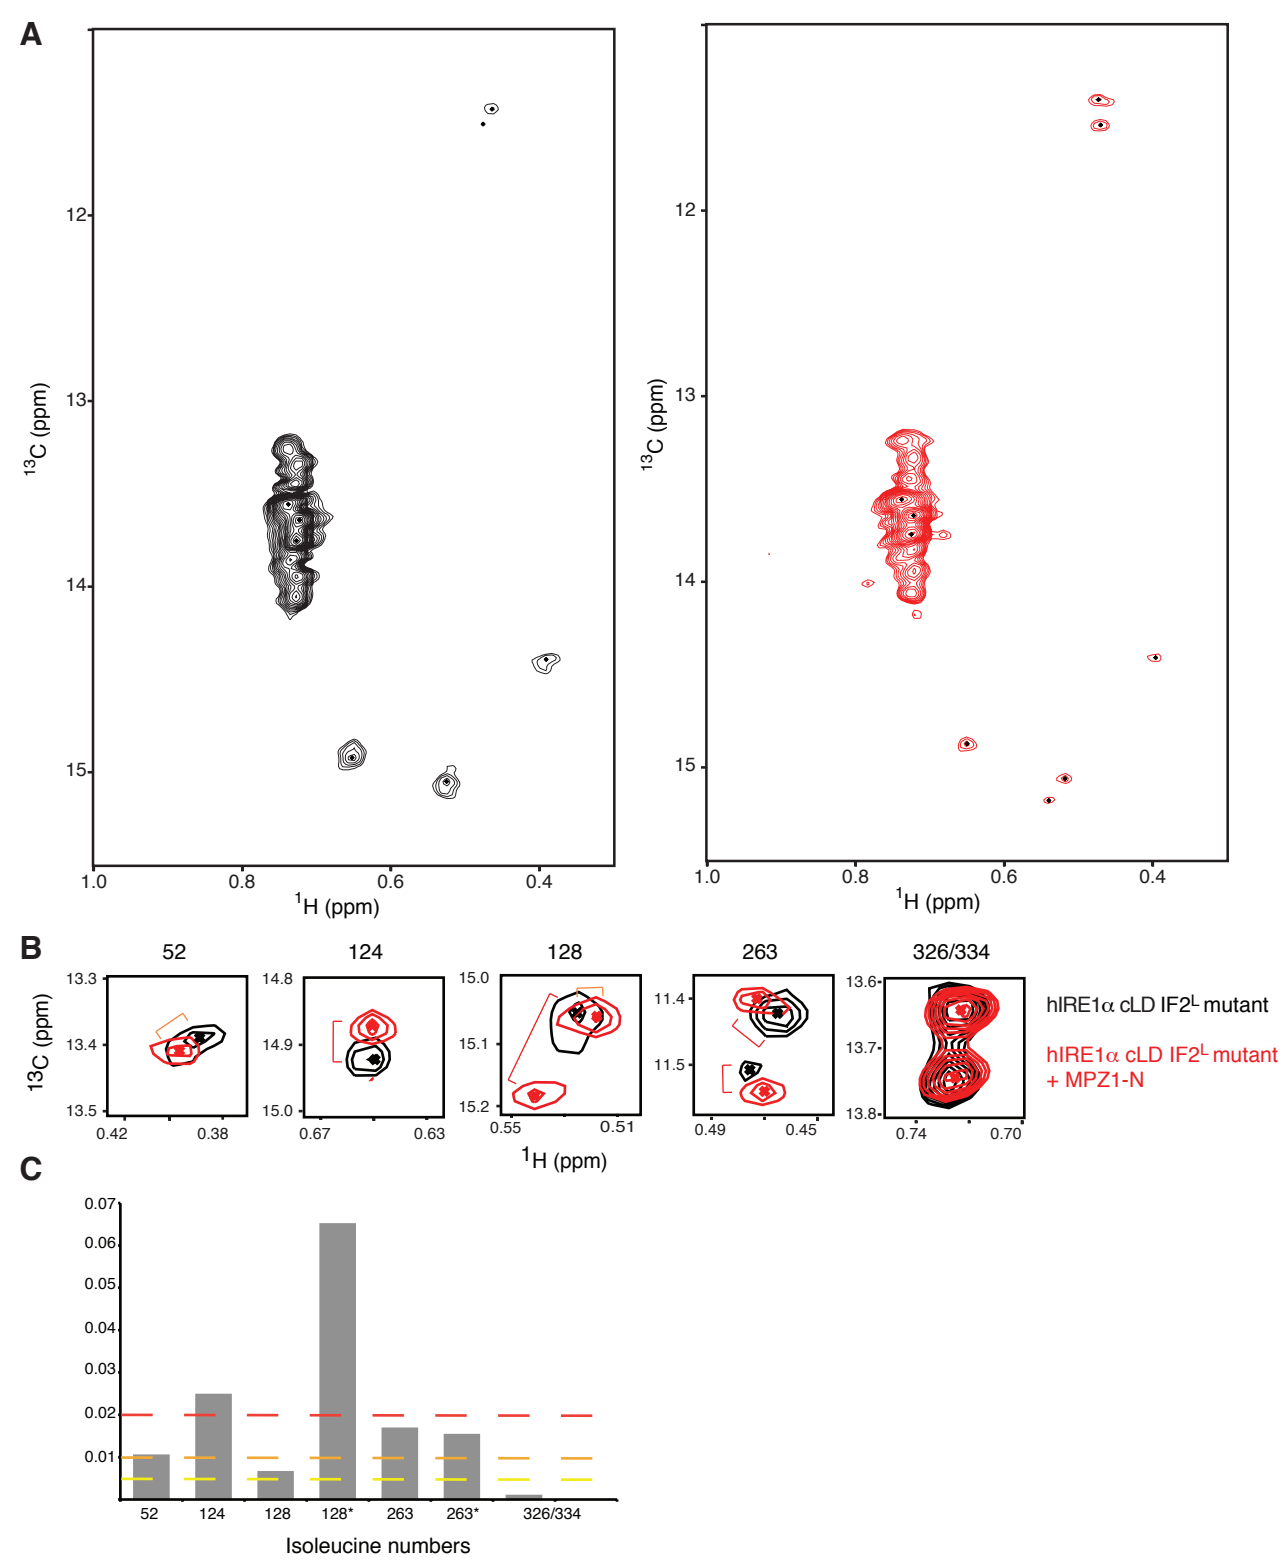

Supplement: supp [file elife-30700-supp-v1.zip]

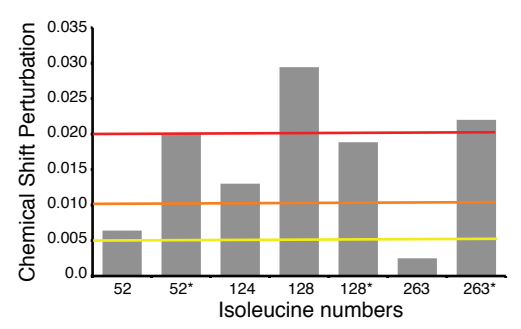

Supplement: supp [file elife-30700-supp-v1.zip]

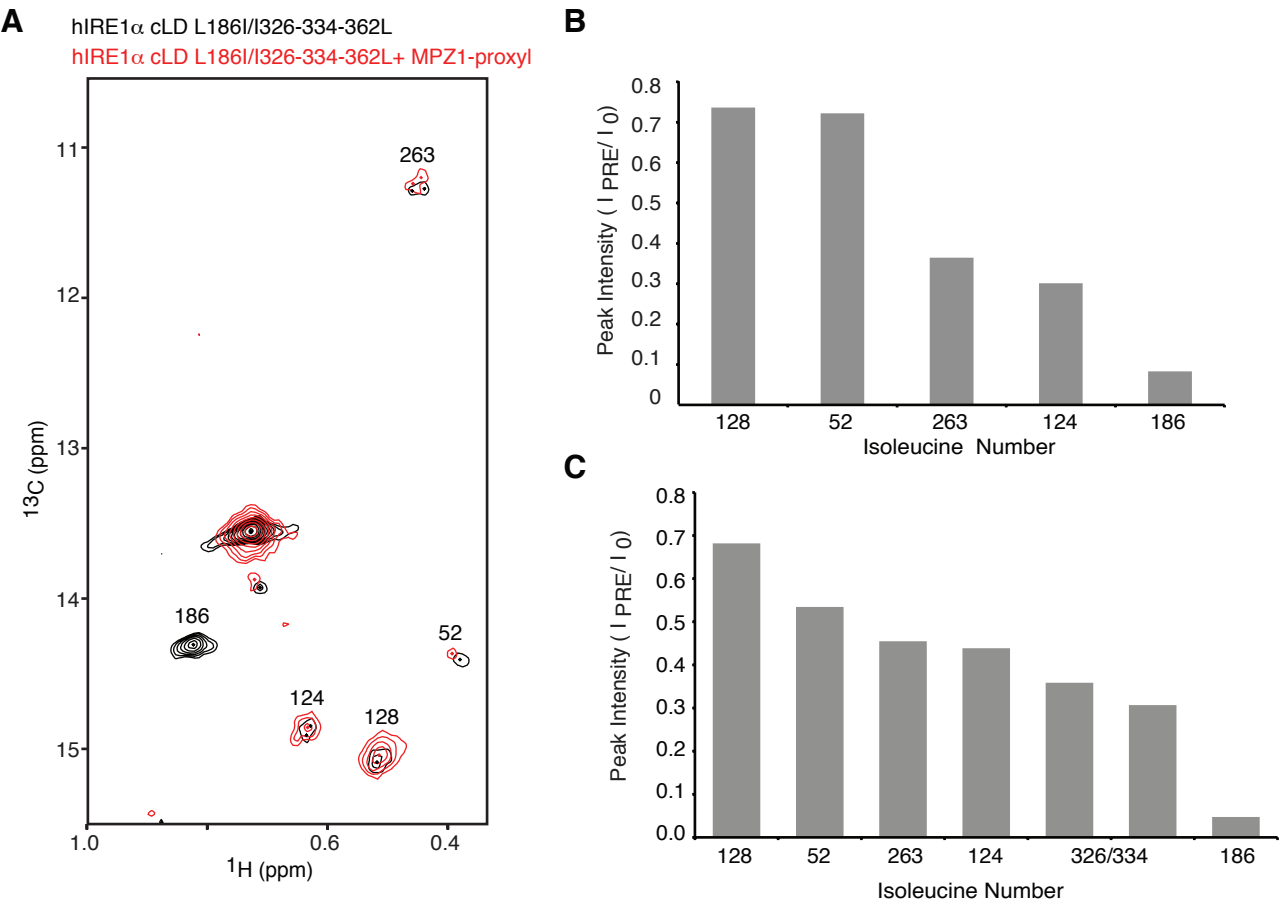

Supplement: supp [file elife-30700-supp-v1.zip]

Karagöz et al., Figure 3-Figure Supplement 1

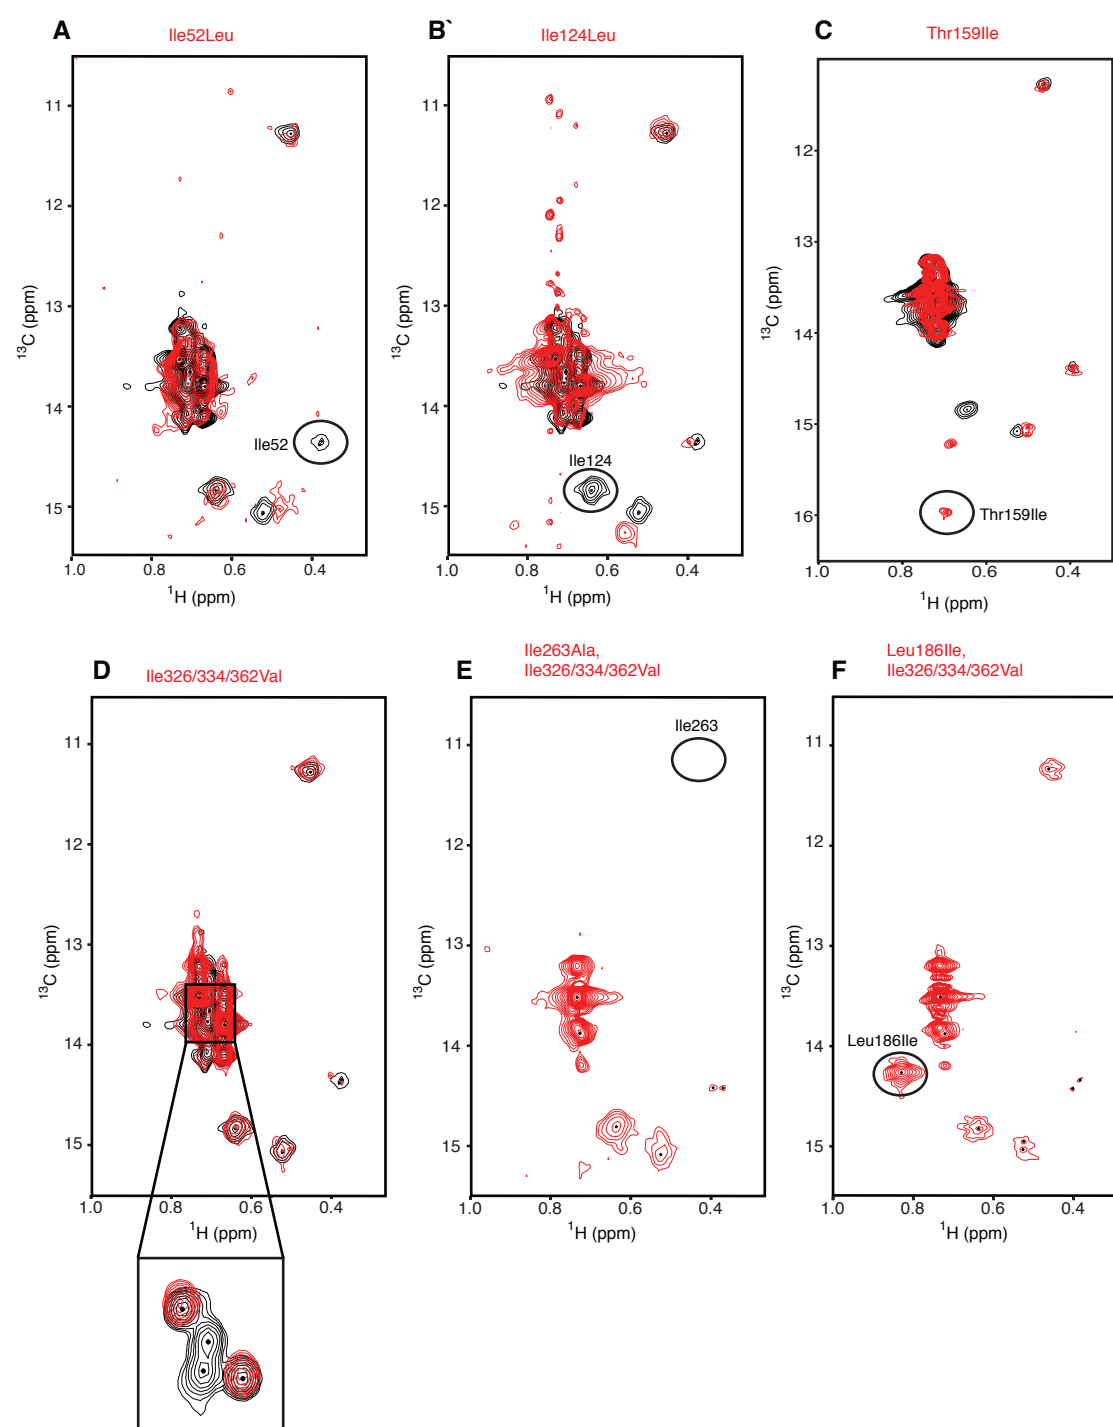

Supplement: supp [file elife-30700-supp-v1.zip]

Karagöz et al., Figure 3-Figure Supplement 4

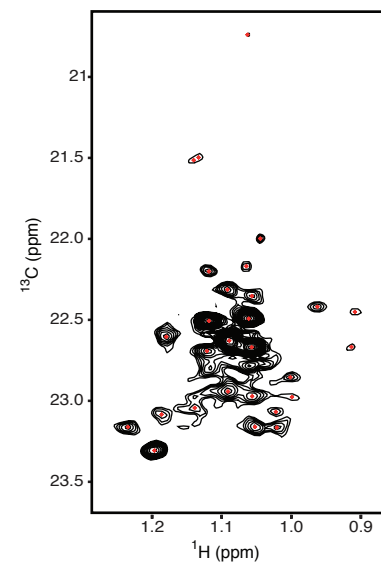

Supplement: supp [file elife-30700-supp-v1.zip]
